# Supplementary material for: Thermal Conductivity Enhancement of Ag/MCM-41 Hybrid Nanofluid for Solar Photothermal Applications
Source: Research Square preprint supplement (doi:10.21203/rs.3.rs-7502565/v1), 2025-09-22
Supplement: Supplementary file 1 [file d0ebd9cc251d4bc2c158a181.docx]

**Electronic Supplementary Material**

**Thermal Conductivity Enhancement of Ag/MCM-41 Hybrid Nanofluid for Solar Photothermal Applications**

Reza Afsharianzadeh1, Mohammad Behbahani2,*, Rashid Pourrajab3, Saman Bagheri4

1 Department of Mechanical Engineering, Faculty of Engineering, Shahid Chamran University of Ahvaz, Ahvaz, Iran

2 Department of Chemistry, Faculty of Sciences, Shahid Chamran University of Ahvaz, Ahvaz, Iran

3 Department of Mechanical Engineering, Shohadaye Hoveizeh Campus of Technology, Shahid Chamran University of Ahvaz, Dashte Azadegan, Iran

4 Department of Chemistry, University of Nebraska-Lincoln, Lincoln, NE 68588, USA

* Corresponding author: [mohammadbehbahani89@yahoo.com](mailto:mohammadbehbahani89@yahoo.com), [m.behbahani@scu.ac.ir](mailto:m.behbahani@shhut.ac.ir)

## **Mathematical modeling of fluid flow within collector tubes**

The fluid flow inside the collector pipes is investigate via the following equations [1].

Heat capacity () was calculated using Equation 1:

| Equation 1 |  |
| --- | --- |

Where Mliq is the mass of the base fluid, CP,liq is the heat capacity of the base fluid, Mnp is the mass of the nanoparticles, and CP,np is the heat capacity of nanoparticles [2].

The viscosity of the nanofluid was calculated using Equation 2.

| Equation 2 |  |
| --- | --- |

Where μ is the viscosity of the hybrid nanofluid, is the viscosity of the base fluid, and is the concentration of the hybrid nanofluid (considering both nanoparticles).

The Reynolds number (Re) is determined using Equation 3:

| Equation 3 |  |
| --- | --- |

Prandtl number (Pr) is determined using Equation 4:

| Equation 4 |  |
| --- | --- |

m, D, A, and *k* represent the mass flow rate, diameter, the cross-sectional area of the tube, and the thermal conductivity of the fluid, respectively.

In case of a laminar flow (Re < 2300), thermal inlet length ( is calculated using:

| Equation 5 |  |
| --- | --- |

If the tube length is shorter than the thermal inlet length from, the fluid flow is developing. In this case, Nusselt number (Nu) is calculated using Equation 6:

| Equation 6 |  |
| --- | --- |

If the heat flux is constant, Nusselt number is 4.36. For a constant temperature, this value is 3.66.

In case of turbulent flow (Re>2300 and 0.5<Pr<2000), Equation 7 is used:

| Equation 7 |  |
| --- | --- |

Where n is 0.11 and 0.25 for heating and cooling, respectively. For smooth pipes, Darcy friction coefficient (f) is obtained using Equation 8 :

| Equation 8 |  |
| --- | --- |

The convection heat transfer coefficient (h) is calculated using Equation 9:

| Equation 9 |  |
| --- | --- |

Solar collector’s thermal efficiency (F′) is calculated using Equation ,:

| Equation 10 |  |
| --- | --- |

Bond conductance ( is defined by Equation :

| Equation 11 |  |
| --- | --- |

Where b is the bond width and γ is the average bond thickness.

The calculations were carried out using TRNSYS simulation. To validate the simulation, Equation 1 to Equation were additionally employed to repeat an experimental study.

**Table S1.** ANOVA table for the Quadratic model

| Source | Sum of Squares | df | Mean  Square | F-value | p-value |  |
| --- | --- | --- | --- | --- | --- | --- |
| **Model** | 168.08 | 9 | 18.68 | 71.68* | < 0.0001 | Significant |
| A (Ag) | 67.51 | 1 | 67.51 | 259.14 | < 0.0001 |  |
| B (MCM-41) | 15.35 | 1 | 15.35 | 58.90 | 0.0006 |  |
| C (Temp) | 33.46 | 1 | 33.46 | 128.42 | < 0.0001 |  |
| AB | 1.51 | 1 | 1.51 | 5.81 | 0.0609 |  |
| AC | 2.79 | 1 | 2.79 | 10.71 | 0.0222 |  |
| BC | 2.59 | 1 | 2.59 | 9.95 | 0.0253 |  |
| A2 | 32.51 | 1 | 32.51 | 124.81 | 0.0001 |  |
| B2 | 12.81 | 1 | 12.81 | 49.16 | 0.0009 |  |
| C2 | 4.90 | 1 | 4.90 | 18.83 | 0.0074 |  |
| **Residual** | 1.30 | 5 | 0.2605 |  |  |  |
| Lack of Fit | 0.2940 | 3 | 0.0980 | 0.1943† | 0.8928 | Not Significant |
| Pure Error | 1.01 | 2 | 0.5043 |  |  |  |
| **Cor total** | 169.38 | 14 |  |  |  |  |

*The Model F-value of 71.68 implies the model is significant. There is only 0.01% chance that an F-value this large could occur due to noise.

†The lack of fit F-value of <0.8 implies the lack of fit is not significant relative to the pure error.

[1] R. Afsharianzadeh, M. Kiani Deh Kiani, M. Behbahani, A. Noghrehabadi, Investigating heat transfer efficiency of hybrid nanofluids based on ZnO/MCM-41 and simulating its effect on the performance of a solar power plant, Journal of Thermal Analysis and Calorimetry, (2025) <https://doi.org/10.1007/s10973-10025-14459-10973>. 10.1007/s10973-025-14459-3.

[2] R. Hentschke, On the specific heat capacity enhancement in nanofluids, Nanoscale Research Letters, 11 (2016) 88. 10.1186/s11671-015-1188-5.
